# Supplementary material for: A review of national policies and strategies to improve quality of health care and patient safety: a case study from Lebanon and Jordan
Source: Springer Nature journal article supplement (doi:10.1186/s12913-017-2528-1), 2017-08-16
Supplement: MOESM1 [file 14220118]

## Additional file 1: Search Strategy

### Quality improvement and patient safety initiatives in Lebanon

Database: PubMed

Last searched: April 26, 2015

| Search              | Query                                          | Items found             |
|---------------------|------------------------------------------------|-------------------------|
| <a href="#">#45</a> | Search #43 AND #32 AND #17                     | <a href="#">231</a>     |
| <a href="#">#44</a> | Search #43 AND #32                             | <a href="#">5579</a>    |
| <a href="#">#43</a> | Search #42 OR #40 OR #37 OR #34 OR #18         | <a href="#">5117428</a> |
| <a href="#">#42</a> | Search "Total Quality Management"[Mesh]        | <a href="#">11909</a>   |
| <a href="#">#40</a> | Search "Benchmarking"[Mesh]                    | <a href="#">10477</a>   |
| <a href="#">#38</a> | Search <b>Benchmarking</b>                     | <a href="#">13181</a>   |
| <a href="#">#37</a> | Search "Patient Safety"[Mesh]                  | <a href="#">6640</a>    |
| <a href="#">#35</a> | Search <b>PATIENT SAFETY</b>                   | <a href="#">89352</a>   |
| <a href="#">#34</a> | Search "Quality Indicators, Health Care"[Mesh] | <a href="#">13833</a>   |
| <a href="#">#32</a> | Search #30 OR #31                              | <a href="#">15420</a>   |
| <a href="#">#31</a> | Search <b>LEBANON</b>                          | <a href="#">15420</a>   |
| <a href="#">#30</a> | Search "Lebanon"[Mesh]                         | <a href="#">2861</a>    |

## Quality improvement and patient safety initiatives in Jordan

Database: Pubmed

Last search: April 20, 2015

| Search              | Query                                                                                                        | Items found             |
|---------------------|--------------------------------------------------------------------------------------------------------------|-------------------------|
| <a href="#">#20</a> | Search <b>#17 AND #18 AND #19</b>                                                                            | <a href="#">226</a>     |
| <a href="#">#19</a> | Search <b>#3 OR #5</b>                                                                                       | <a href="#">23601</a>   |
| <a href="#">#18</a> | Search <b>#2 OR #7 OR #9</b>                                                                                 | <a href="#">5115351</a> |
| <a href="#">#17</a> | Search <b>#13 OR #16</b>                                                                                     | <a href="#">240220</a>  |
| <a href="#">#16</a> | Search <b>"Academic Medical Centers"[Mesh] OR "Hospitals, Teaching"[Mesh]</b>                                | <a href="#">72793</a>   |
| <a href="#">#13</a> | Search <b>"Hospitals"[Mesh]</b>                                                                              | <a href="#">209146</a>  |
| <a href="#">#9</a>  | Search <b>"Quality of Health Care"[Mesh]</b>                                                                 | <a href="#">5107229</a> |
| <a href="#">#7</a>  | Search <b>"Quality Improvement"[Mesh]</b>                                                                    | <a href="#">7569</a>    |
| <a href="#">#5</a>  | Search <b>"Jordan"[Mesh]</b>                                                                                 | <a href="#">2743</a>    |
| <a href="#">#3</a>  | Search <b>jordan</b>                                                                                         | <a href="#">23601</a>   |
| <a href="#">#2</a>  | Search <b>"Accreditation"[Mesh] OR "Joint Commission on Accreditation of Healthcare Organizations"[Mesh]</b> | <a href="#">16362</a>   |
