# Supplementary material for: A review of national policies and strategies to improve quality of health care and patient safety: a case study from Lebanon and Jordan
Source: Springer Nature journal article supplement (doi:10.1186/s12913-017-2528-1), 2017-08-16
Supplement: MOESM2 [file 14220118]

## Additional file 2: Survey tool to assess health systems quality improvement and patient safety initiatives

### Part I: National Quality Improvement and Patient Safety Initiatives

#### 1: National policies and legislations for quality improvement and patient safety

| Statement                                                                                                                                                                      | Yes<br>(Y) | No<br>(N) | Comment<br>(if needed) |
|--------------------------------------------------------------------------------------------------------------------------------------------------------------------------------|------------|-----------|------------------------|
| <b>1.1 Environment and policy context</b>                                                                                                                                      |            |           |                        |
| a. There is a national policy/legislation for quality and safety of health care.                                                                                               |            |           |                        |
| b. There is a statutory legal requirement for health care organizations to implement specific quality improvement strategies/systems.                                          |            |           |                        |
| c. There is a clear vision and strategic direction to guide and support the implementation of quality and safety interventions in health care organizations.                   |            |           |                        |
| d. There is a standardized set of national indicators for health care organization performance benchmarking and improvement.                                                   |            |           |                        |
| e. There is a standardized national definition for quality (e.g. technical, social, economic, etc...).                                                                         |            |           |                        |
| <b>1.2 There is a national policy/legislation that:</b>                                                                                                                        |            |           |                        |
| a. commits the ministry of health to lead quality improvement by example and to ensure that quality remains visible on every management agenda                                 |            |           |                        |
| b. identifies the responsibilities and accountabilities of public, private and professional bodies (e.g. for training, monitoring)                                             |            |           |                        |
| <b>1.3. Incentives and disincentives for quality and patient safety</b>                                                                                                        |            |           |                        |
| a. The national policy/legislation identifies incentives to motivate staff and health care organizations to participate in quality improvement and patient safety initiatives. |            |           |                        |
| b. The national policy/legislation identifies consequences for health care organizations that fail to engage in quality improvement activities.                                |            |           |                        |
| c. Quality performance is a requirement in the contractual agreement.                                                                                                          |            |           |                        |

#### 2: National organizations and institutions for quality improvement and patient safety

| Statement                                                                                                                                         | Yes<br>(Y) | No<br>(N) | Comment<br>(if needed) |
|---------------------------------------------------------------------------------------------------------------------------------------------------|------------|-----------|------------------------|
| <b>2.1 Coordination of quality improvement is clearly defined</b>                                                                                 |            |           |                        |
| a. There is an identified quality unit and a named accountable officer at the Jordanian Ministry of Health.                                       |            |           |                        |
| b. An organizational chart identifies sections within the ministry which contribute to quality improvement, and shows relationships between them. |            |           |                        |
| c. A published annual report identifies quality activities and quantified improvements in performance of the health care system.                  |            |           |                        |
| <b>2.2 Accountability and mechanisms for implementing quality improvement</b>                                                                     |            |           |                        |

|                                                                                                                                                                                                     |  |  |  |
|-----------------------------------------------------------------------------------------------------------------------------------------------------------------------------------------------------|--|--|--|
| a. Quality improvement and patient safety is explicitly incorporated into national health plans/programs.                                                                                           |  |  |  |
| b. Implementation of national guidance (e.g. reports, ministry/government advices) is followed up through performance management or independent review in primary, secondary and tertiary services. |  |  |  |
| c. The same requirements for health care quality improvement are in place for both public and private health care organizations.                                                                    |  |  |  |
| <b>2.3 Support structures</b>                                                                                                                                                                       |  |  |  |
| a. There is a national association/society for quality and patient safety in health care.                                                                                                           |  |  |  |
| b. There is a national quality committee/organization representing consumers, providers, insurers, and professions.                                                                                 |  |  |  |
| c. There is a resource center for the collation and dissemination of comprehensive comparative information on health system performance (quality, quantity, cost, etc...).                          |  |  |  |

### 3: Methods, techniques and tools for quality improvement and patient safety

| Statement                                                                                                                                                                     | Yes (Y) | No (N) | Comment (if needed) |
|-------------------------------------------------------------------------------------------------------------------------------------------------------------------------------|---------|--------|---------------------|
| <b>3.1 Statutory mechanisms for quality and patient safety</b>                                                                                                                |         |        |                     |
| a. There are mandatory public reporting systems with common indicators among all health care organizations to monitor and evaluate the implementation of quality initiatives. |         |        |                     |
| b. Existing information systems allow quality and performance to be monitored on a continuing basis across the health system.                                                 |         |        |                     |
| c. Doctors, dentists, nurses and allied practitioners are licensed.                                                                                                           |         |        |                     |
| d. Practitioners are periodically re-licensed.                                                                                                                                |         |        |                     |
| e. Medical equipment and drugs are licensed.                                                                                                                                  |         |        |                     |
| f. Private and public health care organizations are licensed.                                                                                                                 |         |        |                     |
| g. There are specific minimum quality and safety indicators for licensing of health care organizations.                                                                       |         |        |                     |
| h. There are specific minimum quality and safety indicators for licensing of primary healthcare centers.                                                                      |         |        |                     |
| i. Health care organizations undergo periodic re-licensing.                                                                                                                   |         |        |                     |
| <b>3.2 Voluntary external quality assessment and improvement programs</b>                                                                                                     |         |        |                     |
| a. There are systematic, confidential national enquiries into the occurrence of adverse events and outcomes in health care.                                                   |         |        |                     |
| b. There is a national external quality assurance system for clinical laboratories.                                                                                           |         |        |                     |
| c. There is a national health care accreditation program in your country                                                                                                      |         |        |                     |
| d. Health care accreditation programs are recognized, endorsed and promoted by the national government.                                                                       |         |        |                     |
| e. There is a formal mechanism by which voluntary external quality assessments align with and complement statutory/legal investigations and inspections.                      |         |        |                     |

## Part II: Health Care Accreditation Program

| Statement                                                                                                                                                                                       | Hospitals  |           | PHCs       |           | Comment<br>(if needed) |
|-------------------------------------------------------------------------------------------------------------------------------------------------------------------------------------------------|------------|-----------|------------|-----------|------------------------|
|                                                                                                                                                                                                 | Yes<br>(Y) | No<br>(N) | Yes<br>(Y) | No<br>(N) |                        |
| <b>1.1 Policies, values and culture for accreditation</b>                                                                                                                                       |            |           |            |           |                        |
| - There is a national law or decree requiring accreditation in your country                                                                                                                     |            |           |            |           |                        |
| - The accrediting organization is formally authorized by national legislation, official decree, or both.                                                                                        |            |           |            |           |                        |
| - The functions of the accreditation program are defined in any national law.                                                                                                                   |            |           |            |           |                        |
| - The policy and management of the accreditation program remain consistent, regardless of changes in government.                                                                                |            |           |            |           |                        |
| - Accredited organizations are automatically assumed to be (re)licensed.                                                                                                                        |            |           |            |           |                        |
| - There is representation on the accrediting body of the major leading health care professional organizations within Jordan                                                                     |            |           |            |           |                        |
| <b>1.2 Incentives and disincentives for accreditation</b>                                                                                                                                       |            |           |            |           |                        |
| - Accreditation is a requirement for the ministry of health to contract with health care organizations.                                                                                         |            |           |            |           |                        |
| - The ministry of health and other government entities reimburse health care organizations, conditional on the attainment of certain performance indicators specified in accreditation program. |            |           |            |           |                        |
| - Public health insurers and other funding agencies provide financial incentives for health care organizations to encourage accreditation.                                                      |            |           |            |           |                        |
| - Private health insurers and other funding agencies provide financial incentives for health care organizations to encourage accreditation.                                                     |            |           |            |           |                        |
| - There are consequences for health care organizations that fail accreditation.                                                                                                                 |            |           |            |           |                        |
| <b>1.3 Program configuration</b>                                                                                                                                                                |            |           |            |           |                        |
| - The purpose of the accreditation program is to promote and document improvement in the performance of health care services.                                                                   |            |           |            |           |                        |
| - Participation in the accreditation program is voluntary.                                                                                                                                      |            |           |            |           |                        |
| - The same program includes public and private facilities.                                                                                                                                      |            |           |            |           |                        |
| - The accreditation program constitutes a single national program.                                                                                                                              |            |           |            |           |                        |
| - The accreditation program covers private and public primary, secondary and tertiary care.                                                                                                     |            |           |            |           |                        |
| - The accreditation program covers private and public polyclinics                                                                                                                               |            |           |            |           |                        |
| <b>1.4 Organization and structure</b>                                                                                                                                                           |            |           |            |           |                        |
| - The accreditation program is governed by a Board which represents professional, public and governmental interest.                                                                             |            |           |            |           |                        |
| - Statutory licensing and registration of individuals and organizations are clearly differentiated from accreditation.                                                                          |            |           |            |           |                        |
| <b>1.5 Accreditation standards</b>                                                                                                                                                              |            |           |            |           |                        |
| a. Accreditation standards are validated/updated on a regular basis                                                                                                                             |            |           |            |           |                        |
| b. The current standards include and refer to external guidance such as the ISQUA principles for standards                                                                                      |            |           |            |           |                        |

|                                                                                                                                                                |  |  |  |  |  |
|----------------------------------------------------------------------------------------------------------------------------------------------------------------|--|--|--|--|--|
| c. Professional associations, users, government, and the public are involved in defining and assessing standards.                                              |  |  |  |  |  |
| d. There are specific criteria that are used to update the standards.                                                                                          |  |  |  |  |  |
| <b>1.6 Process of accreditation</b>                                                                                                                            |  |  |  |  |  |
| e. Performance indicators are mandated and monitored for compliance.                                                                                           |  |  |  |  |  |
| f. There is a standardized tool for measuring the performance indicators.                                                                                      |  |  |  |  |  |
| g. Procedures and results are made transparent and fair.                                                                                                       |  |  |  |  |  |
| h. There are mechanisms in place to ensure quality is maintained and sustained beyond the accreditation period.                                                |  |  |  |  |  |
| i. There are certified national accreditation surveyors/auditors.                                                                                              |  |  |  |  |  |
| j. The accreditation surveyors/auditors are trained and re-validated periodically.                                                                             |  |  |  |  |  |
| <b>1.7 Resources for accreditation</b>                                                                                                                         |  |  |  |  |  |
| - There is adequate funding for sustainability of accreditation program.                                                                                       |  |  |  |  |  |
| - The accreditation program has access to aggregated data which are routinely reported to the ministry of health and other entities by health care providers.  |  |  |  |  |  |
| - Health care organizations provide health personnel with accurate, complete and timely data by which clinical and organizational performance can be measured. |  |  |  |  |  |
| - Health personnel are trained to evaluate and improve the performance of their own work and of their health care organization.                                |  |  |  |  |  |
| - Health personnel receive formal training on how to enforce accreditation standards.                                                                          |  |  |  |  |  |
| - Health personnel receive formal training on how to act on quality improvement opportunities based on recommendations from accreditation surveys              |  |  |  |  |  |
| - Directors of health care services have formal training in accreditation requirements.                                                                        |  |  |  |  |  |

### **Part III: Infrastructure and Resources at the Level of Health Care Organizations**

| <b>Statements</b>                                                                                                                                                                                                                                | <b>Yes<br/>(Y)</b> | <b>No<br/>(N)</b> | <b>Comment<br/>(if needed)</b> |
|--------------------------------------------------------------------------------------------------------------------------------------------------------------------------------------------------------------------------------------------------|--------------------|-------------------|--------------------------------|
| <b>1.1 Infrastructure</b>                                                                                                                                                                                                                        |                    |                   |                                |
| a. Quality improvement plans and mechanisms are integrated within health care organizations (e.g. clinical governance, continuous quality improvement, staff and patient satisfaction surveys, audit, performance measurement, risk management). |                    |                   |                                |
| b. Performance analysis and improvement are included in the continuing professional development program provided by health care organizations.                                                                                                   |                    |                   |                                |
| <b>1.2 Human resources for health</b>                                                                                                                                                                                                            |                    |                   |                                |
| a. Health care leaders instill a culture of continuous quality improvement and patient safety at healthcare organizations.                                                                                                                       |                    |                   |                                |
| b. Directors of health care services have formal training in health management and quality requirements.                                                                                                                                         |                    |                   |                                |
| c. Health personnel have protected time to participate in quality improvement and patient safety initiatives.                                                                                                                                    |                    |                   |                                |
| d. Health personnel are trained to evaluate and improve the performance of their own work and that of their healthcare organization.                                                                                                             |                    |                   |                                |
| e. Health personnel receive formal training on how to enforce accreditation standards.                                                                                                                                                           |                    |                   |                                |
| f. There are incentives for health personnel to engage in quality improvement.                                                                                                                                                                   |                    |                   |                                |
| g. Relevant techniques of quality improvement are incorporated in the curriculum, teaching and examination of all clinical undergraduates.                                                                                                       |                    |                   |                                |
| <b>1.3 Information system</b>                                                                                                                                                                                                                    |                    |                   |                                |
| a. There is an agreed minimum patient data set that should be collected in a standardized manner by health care organizations.                                                                                                                   |                    |                   |                                |
| b. Patient administration systems are designed to generate indicators, indices and data for clinical and administrative review.                                                                                                                  |                    |                   |                                |
| c. Accurate, complete and timely data are available by which clinical and organizational performance can be measured.                                                                                                                            |                    |                   |                                |
| <b>1.4 Financial resources</b>                                                                                                                                                                                                                   |                    |                   |                                |
| a. Health service performance /contractual agreements identify agreed quality targets as well as price and volume of clinical activity.                                                                                                          |                    |                   |                                |
| b. There is a yearly budget allocated for quality improvement initiatives within healthcare organizations.                                                                                                                                       |                    |                   |                                |
